# Supplementary material for: Healthcare Access and its Determinants among Elderly Individuals Living Alone in Rural India: A Cross-Sectional Study
Source: Research Square preprint supplement (doi:10.21203/rs.3.rs-7642824/v1), 2025-11-12
Supplement: Supplementary file 1 [file 79d057b6ca5e691214ae395d.docx]

**Questionnaire:**

**Socio-Demographic Information**

1**.**  What is your name?

2. Age:

a) 60-70 years

b) >70 years

3. Gender:

a) Male

b) Female

c) Others

4. What is your Marital Status?

a)Unmarried

b) Married and living with the spouse in the same household

c) Married but living in a separate household

d) Widow/Widower

e) Divorced/Separated

5. Education:

a) No formal education

b) Primary (1-4)

c) Secondary (5-8)

d) Higher Secondary (9-12)

e) Graduate and above

6. Occupation:

a) Farming (Owning a farm)

b) Farm Labourer

c) Service

d) Business

e) Labourer (other than farm/daily wager)

f) Retired from service

g) Unemployed

h)Other:_________
 (If options chosen between A-E, skip to que 8)

7. What is your source of income?

a) Relying on family members

b) Social security schemes (through government)

c) Pension (if any)

8. What type of ration card do you have?

a) APL

b) BPL

c) Antodaya

d) No ration card

**Healthcare Access**

9. Do you have access to a nearby healthcare facility?

a) Yes

b) No

10. What type of healthcare facilities are available near you?

a) Government

b) Private

c) Both

11. Which type of healthcare facility do you usually prefer for your medical needs?

a) Sub Centre

b) PHC

c) District hospital

d) Tertiary centre/trust hospital (Sevagram/sawangi)

e) Community owned clinics (Kiran clinic)

f) Private clinics/hospital

g) Don’t know where to go

12. How far is the preferred nearest healthcare facility?

a) Within < 1 km

b) 1-5 kms away

c) 5-10 kms away

d) >10 kms away

13. How do you usually seek healthcare when needed?

a) Independently

b) Relying on others

14. How challenging do you find transportation for accessing healthcare facilities?

a) Not at all

b) A little

c) Very much

15. Do you have access to free healthcare services?

a) Yes

b) No

If yes, What type of healthcare services are you receiving for free?

1. OPD services

2. IPD services

3. Blood tests

4. Other diagnostic tests

5. Medicines

16. For emergency healthcare services, which healthcare facility do you visit?

a) Sub Centre

b) PHC

c) District hospital

d) Tertiary centre/trust hospital (Sevagram/sawangi)

e) Community owned clinics (Kiran clinic)

f) Private clinics/hospital

g) Don’t know where to go

17.Do you have any chronic health conditions?

a) Cancer

b) HTN

c) DM

d) Heart disease or other cardiovascular diseases

e) Stroke (paralysis)

f) Thyroid disorder

g) Asthma

h) Arthritis

i) GIT issues

j) Infectious diseases (like TB)

k) Mobility/disability issues

l) No

18. How often do you skip or delay medical care due to cost?

a) Always

b) Often

c) Sometimes

d) Never

19. How often do you have someone available to take care of you if you require admission?

a) Always

b) Often

c) Sometimes

d) Never

20. How satisfied are you with the way healthcare staff treat you during your visits?

a) Very much

b) A little

c) Not satisfied

21. Do healthcare providers spend enough time addressing your health concerns?

a) Always

b) Often

c) Sometimes

d) Never

22. What are the main barriers you face in accessing healthcare services? (Open-ended)

1. Transportation issues

2. Financial issues

3. Healthcare facility challenges

4. Physical or disability related issues

5. Lack of social support

6. No issues/barriers

**Day-to-Day Life Management**

23.Can you move around inside your home without help?

a) Yes, Always

b) Sometimes needs help

c) Rarely needs help

d) Never

24. Can you eat your meals without help?

a) Yes, Always

b) Sometimes needs help

c) Rarely needs help

d) Never

25. Can you bathe yourself without help?

a) Yes, Always

b) Sometimes needs help

c) Rarely needs help

d) Never

26.Can you use the toilet on your own?

a) Yes, Always

b) Sometimes needs help

c) Rarely needs help

d) Never

27.Can you dress yourself without help?

a) Yes, Always

b) Sometimes needs help

c) Rarely needs help

d) Never

28.Can you go out to shop for groceries without help?

a) Yes, Always

b) Sometimes needs help

c) Rarely needs help

d) Never

29. Can you manage household tasks (e.g., cleaning, cooking) without help?

a) Yes, Always

b) Sometimes needs help

c) Rarely needs help

d) Never

30. How do you manage your finances?

a) Independently

b) Occasional help from others

c) Regular help from others

31. Do you need transportation facilities to take care of needs other than healthcare?

a) Own vehicle

b) seek family/neighbors help

c) public transport (bus, auto, etc.)

d) No need to go outside
