# Supplementary material for: Healthcare Access and its Determinants among Elderly Individuals Living Alone in Rural India: A Cross-Sectional Study
Source: Research Square preprint supplement (doi:10.21203/rs.3.rs-7642824/v1), 2025-11-12
Supplement: Supplementary file 2 [file 9fae71f2626168d481cc03b9.docx]

**Annexure 1: STROBE checklist**

| **Item No** | **Recommendation** | **Reported on Page #** |
| --- | --- | --- |
| **Title and abstract** | | |
| 1 | (a) Indicate the study’s design with a commonly used term in the title or the abstract | Pg no. 1 |
|  | (b) Provide informative and balanced summary of what was done and what was found | Pg 4-6 |
| **Introduction** | | |
| 2. Background/Rationale | Explain scientific background and rationale for the investigation being reported | Pg 6-8 |
| 3. Objectives | State specific objectives, including prespecified hypotheses | Pg 8 |
| **Methods** | | |
| | **4. Study design** | | --- |  |  | | --- | | Present key elements of study design early in the paper | Pg 8 |
| | **5. Setting** | | --- | | Describe setting, locations, and relevant dates, including periods of recruitment, exposure, follow-up, and data collection | Pg 8, 9 |
| | **6. Participants** | | --- |  |  | | --- | | (a) Eligibility criteria, sources/methods of selection of participants | Pg 9 |
| | **7. Variables** | | --- | | Clearly define outcomes, exposures, predictors, potential confounders, and effect modifiers. Give diagnostic criteria, if applicable | Pg 9, 10 |
| | **8. Data sources/measurement** | | --- |  |  | | --- | | For each variable of interest, give sources of data and details of methods of assessment (measurement). Describe comparability of assessment methods if there is more than one group | Pg 9, 10 |
| | **9. Bias** | | --- | | Describe any efforts to address potential sources of bias | Pg 10 |
| | **10. Study size** | | --- |  |  | | --- | | Explain how study size was arrived at | Pg 8 |
| | **11. Quantitative variables** | | --- |  |  | | --- | | Explain how quantitative variables were handled in the analyses. If applicable, describe which groupings were chosen and why | Pg 10, 11 |
| | **12. Statistical methods** |  | | --- | --- |  |  | | --- | | (a) Describe all statistical methods, including those used to control for confounding | Pg 10, 11 |
| |  | (b) Describe any methods used to examine subgroups and interactions | | --- | --- | | Not reported |
| (c) Explain how missing data were addressed | Not applicable |
| |  | (d) If applicable, describe analytical methods taking account of sampling strategy | | --- | --- | | Pg 10, 11 |
| | (e) Describe any sensitivity analyses | | --- | | Not applicable |
| **Results** | | |
| | **13. Participants** | | --- | | a) Report numbers at each stage | Pg 8 |
| (b) Give reasons for non-participation at each stage | Pg 8 |
| (c) Consider use of a flow diagram | Not included |
| 14. Descriptive data | (a) Give characteristics of study participants (eg demographic, clinical, social) and information on exposures and potential confounders | Table 1, 2 and 3 |
| (b) Indicate number of participants with missing data for each variable of interest | Not explicitly reported |
| 15. Outcome data | Report numbers of outcome events or summary measures | Table 2 and 3 |
| 16. Main results | (a) Give unadjusted estimates and, if applicable, confounder-adjusted estimates and their precision (eg, 95% confidence interval). Make clear which confounders were adjusted for and why they were included | Table 4 |
|  | (b) Report category boundaries when continuous variables were categorized | Not applicable |
|  | (c) If relevant, consider translating estimates of relative risk into absolute risk for a meaningful time period | Not applicable |
| 17. Other analyses | Report other analyses done—eg analyses of subgroups and interactions, and sensitivity analyses | Not applicable |
| **Discussion** | | |  |  |
| 18. Key results | Summarise key results with reference to study objectives | Pg 11-13 |
| 19. Limitations | Discuss limitations of the study, taking into account sources of potential bias or imprecision. Discuss both direction and magnitude of any potential bias | Pg 18 |
| 20. Interpretation | Give a cautious overall interpretation of results considering objectives, limitations, multiplicity of analyses, results from similar studies, and other relevant evidence | Pg 13-17 |
| 21 Generalisability | Discuss the generalisability (external validity) of the study results | Pg 18 |
| **Other information** | | |
| 22. Funding | Give the source of funding and the role of the funders for the present study and, if applicable, for the original study on which the present article is based | Pg 3-4 (Funding section) |
